# Supplementary material
Source: MDPI journal article supplement (https://www.mdpi.com/1999-4907/12/7/919)
Supplement: s1 [file s1]

## SUPPLEMENTARY MATERIAL

### Part 1

#### **Semi-structured interview to identify ecosystem services, disservices and drivers of change for key stakeholders in the municipality of Coyaima**

##### *1. Socio-demographic characteristics*

Date:\_\_\_\_\_ Name:\_\_\_\_\_ Age:\_\_\_\_\_  
Gender:\_\_\_\_\_ Education:\_\_\_\_\_ Occupation:\_\_\_\_\_  
Place of Birth:\_\_\_\_\_ Municipality of residence:\_\_\_\_\_ If  
the answer is "Coyaima": where in Coyaima?\_\_\_\_\_  
Time of residence in the municipality of  
Coyaima:\_\_\_\_\_  
Do you belong to an indigenous reservation?(Y/N)\_\_\_\_\_  
Which one?\_\_\_\_\_

##### *2. Perception of services and disservices of the municipality of Coyaima.*

- What benefits do you obtain from nature in Coyaima for your life??
- Why did you identify these benefits?
- How do you use the benefits you mentioned before?
- What damages or losses do they get from nature?
- Why these damages affected you?
- What activities do you do to reduce these damages?

##### *3. Identification and perception of possible drivers of change in the municipality of Coyaima.*

- Which land cover classes are present in Coyaima?
- What activities or factors change the above-mentioned land cover classes?

## Part 2

**Ecosystem services, disservices and drivers of change identified by the interviewees in Coyaima (answers; no particular order).**

| Services                                                                                                                                                                                                                                                                                                                                                                                                                                                                                                                                                                                                                                                                                                                                          | Disservices                                                                                                                                                                                                                                                                                                             | Drivers of change                                                                                                                                                                                                                                                                                                                                                                                                                                                                                                                      |
|---------------------------------------------------------------------------------------------------------------------------------------------------------------------------------------------------------------------------------------------------------------------------------------------------------------------------------------------------------------------------------------------------------------------------------------------------------------------------------------------------------------------------------------------------------------------------------------------------------------------------------------------------------------------------------------------------------------------------------------------------|-------------------------------------------------------------------------------------------------------------------------------------------------------------------------------------------------------------------------------------------------------------------------------------------------------------------------|----------------------------------------------------------------------------------------------------------------------------------------------------------------------------------------------------------------------------------------------------------------------------------------------------------------------------------------------------------------------------------------------------------------------------------------------------------------------------------------------------------------------------------------|
| <ol style="list-style-type: none"><li>1. Cultural belonging</li><li>2. Agriculture</li><li>3. Drinking water</li><li>4. Livestock</li><li>5. Food trade</li><li>6. Climate regulation</li><li>7. Traditional medicine</li><li>8. Soil nutrients</li><li>9. Oxygen production</li><li>10. Pest animals</li><li>11. Pet food</li><li>12. Pig farming</li><li>13. Poultry</li><li>14. Sheep farming</li><li>15. Shadow for the animals</li><li>16. Tourism</li><li>17. Conservation of fauna and flora</li><li>18. Healthy environment</li><li>19. Air quality</li><li>20. Food production</li><li>21. CO2 regulation</li><li>22. Fish farming</li><li>23. Keeping of pets</li><li>24. Soil fertility</li><li>25. Decrease in soil erosion</li></ol> | <ol style="list-style-type: none"><li>1. Unstable weather</li><li>2. High temperatures during the day</li><li>3. Pests (animals or plants)</li><li>4. Vector diseases</li><li>5. Forest fires</li><li>6. Gales</li><li>7. Desertification</li><li>8. Drought</li><li>9. Floods</li><li>10. Fear of dark areas</li></ol> | <ol style="list-style-type: none"><li>1. Natural and anthropic fires</li><li>2. Agricultural expansion</li><li>3. Deforestation</li><li>4. Over-exploitation of soils</li><li>5. Accumulation of fertilizers</li><li>6. Garbage disposal</li><li>7. Water pollution</li><li>8. Mining activities</li><li>9. Rice cropping activities</li><li>10. Urban expansion</li><li>11. Soil erosion</li><li>12. Lack of environmental education of people</li><li>13. Lack of compliance in the realization of the Land Use Plan (POT)</li></ol> |

### Part 3. Survey used for assessing the ecosystem services of the municipality of Coyaima, Colombia

Name \_\_\_\_\_ Age (<18) (18-30) (31-45) (46-60) (>60) Gender F ( ) M ( )

Education: None ( ) Preschool ( ) Primary ( ) Secondary ( ) Professional ( ) Technical ( ) Other: \_\_\_\_\_

Occupation: Agriculture ( ), Services/commerce ( ), State ( ), Transportation ( ), Education ( ), Health ( ), Home ( ), other \_\_\_\_\_ Place of origin \_\_\_\_\_ Place where you live \_\_\_\_\_ Name of the *vereda* where you live in Coyaima \_\_\_\_\_ Time of living there (years): \_\_\_\_\_

Indigenous reservation ( ) cabildo ( ) Which one? \_\_\_\_\_

**1. What benefits are offered to you by ecosystems in the municipality of Coyaima? Pick the two that are most important.**

Air purification  
Climate regulation  
Cultural identity Biodiversity  
Provision and purification of water  
Economic support  
Food production  
Recreation / Ecotourism  
Spiritual and / or religious  
Keeping and obtaining pets  
OTHER: \_\_\_\_\_

**2. What damages or costs are occurring in the municipality of Coyaima? Pick the two that are most important to you.**

Unsafety  
Human diseases  
Livestock / agricultural pests  
Drought and floods  
Fear of wildlife  
Unstable weather  
High temperatures  
Pests of animals and plants  
Fires  
Gales  
Fear and stress in dark areas  
OTHER: \_\_\_\_\_

**3. Which activities are causing damage to ecosystems in and**

**around the Municipality of Coysima. Pick the two most important ones.**

Garbage and debris dumping  
Selective logging  
Farming  
Cattle raising  
Fires  
Lack of education  
Mining activity  
Rice cropping activities  
Soil erosion  
OTHER: \_\_\_\_\_

**4. Can you name 3 entities that regulate activities carried out in the municipality of Coyaima?**

YES\_\_ NO\_\_ Which ones?

A: \_\_\_\_\_  
B: \_\_\_\_\_  
C: \_\_\_\_\_  
Other: \_\_\_\_\_

**5. Would you participate during your weekends in restoration, management or nature care activities in the municipality of Coyaima?**

NO ( ) YES ( )  
No: Why? \_\_\_\_\_

Yes: How many hours per month? \_\_\_\_\_

**Yes: Which type of activities?:**

Allocate part of your property to conservation ( )  
Plant trees and vegetation ( )  
Recover waterbodies ( )  
Construction of living fences ( )  
Agriculture without agrochemicals ( )  
Recycling ( )  
OTHER: \_\_\_\_\_

**Would you participate in these activities with any of the entities that have a presence in the region (listed below)?**

NO ( ) YES ( )  
Why? \_\_\_\_\_

#### LIST OF ENTITIES

1. Autonomous region of Tolima (Cortolima)
2. Town Hall
3. Coordination of the ecological rural area (CARE)
4. Agency for rural development (ADR)
5. Colombian Agricultural Institute

**Table S1.** Map of Continental, Coastal and Marine Ecosystems of Colombia (MEC) and Cortolima land use land cover classes (LULC; ha and %) for the municipality of Coyaima (Cortolima, 2011; IDEAM et al., 2017).

| LULC MEC                                                                                                                       | LULC Cortolima                                     | Hectares | % of Coyaima surface |
|--------------------------------------------------------------------------------------------------------------------------------|----------------------------------------------------|----------|----------------------|
| Lake<br>River                                                                                                                  | Water bodies                                       | 1,909    | 2.9                  |
| Gallery forest and<br>riparian zones<br>Secondary vegetation                                                                   | Forest and semi-<br>natural areas                  | 3,288    | 5                    |
| Open shrubland<br>Dense shrubland<br>Open areas with no<br>vegetation<br>Open grassland<br>Dense grassland                     | Degraded areas                                     | 9,798    | 15                   |
| Rice<br>Temporary crops                                                                                                        | Agricultural areas                                 | 2,059    | 3                    |
| Pasture                                                                                                                        | Pasture areas                                      | 30,935   | 46                   |
| Artificial land                                                                                                                | Artificial/Built areas                             | 66       | 0.1                  |
| Mosaic of crops and<br>pastures<br>Mosaic of crops,<br>pastures and natural<br>spaces<br>Mosaic of crops and<br>natural spaces | Mosaic of crops,<br>pastures and natural<br>spaces | 18,997   | 28                   |

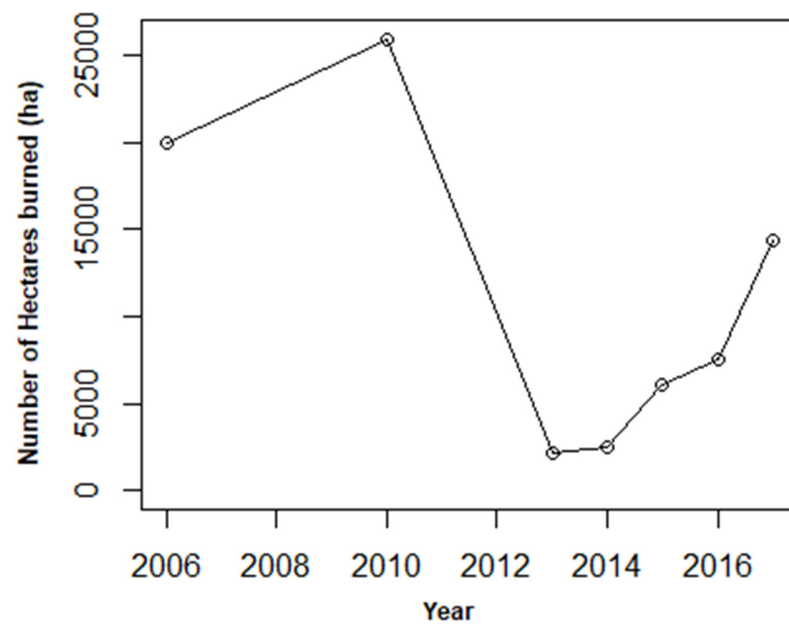

**Figure S1.** Burned area (ha) between years 2006-2017 in Coyaima, Colombia
